# Supplementary material
Source: PubMed Central journal article supplement (PMC4567406)
Supplement: NIHMS719264-supplement-Supporting_Information.pdf [file NIHMS719264-supplement-Supporting_Information.pdf]

## Supporting Information

# Inhibition of Cancer-Associated Mutant Isocitrate Dehydrogenases by 2-thiohydantoin compounds

*Fangrui Wu,<sup>†,§</sup> Baisong Zheng,<sup>†,§</sup> Hong Jiang,<sup>†,§</sup> Mari Kogiso,<sup>¶</sup> Yuan Yao,<sup>†</sup> Chao Zhou,<sup>†</sup> Xiao-Nan Li,<sup>¶</sup>*

*Yongcheng Song<sup>\*,†,‡</sup>*

<sup>†</sup> Department of Pharmacology, <sup>¶</sup> Department of Pediatrics-oncology, <sup>‡</sup> Dan L. Duncan Cancer Center,  
Baylor College of Medicine, 1 Baylor Plaza, Houston, TX 77030, USA.

### Table of Contents

|                      |         |
|----------------------|---------|
| Table S1             | Page S2 |
| Figure S1            | Page S3 |
| Figure S2            | Page S4 |
| Figure S3            | Page S5 |
| Figure S4            | Page S6 |
| Experimental Section | Page S7 |

**Table S1.** Data processing and refinement statistics

|                                                                | IDH1 <sup>R132H</sup> : <b>16</b>                     | IDH1 <sup>R132H</sup> : <b>22</b>                     |
|----------------------------------------------------------------|-------------------------------------------------------|-------------------------------------------------------|
| A. Data processing                                             |                                                       |                                                       |
| Wavelength (Å)                                                 | 1.542                                                 | 1.542                                                 |
| Space group                                                    | <i>P4</i> <sub>3</sub> <i>2</i> <sub>1</sub> <i>2</i> | <i>P4</i> <sub>3</sub> <i>2</i> <sub>1</sub> <i>2</i> |
| Unit cell dimensions                                           |                                                       |                                                       |
| <i>a</i> , <i>b</i> , <i>c</i> (Å)                             | 82.41, 82.41, 304.30                                  | 82.59, 82.59, 306.60                                  |
| <i>α</i> , <i>β</i> , <i>γ</i> (°)                             | 90.0, 90.0, 90.0                                      | 90.00, 90.00, 90.00                                   |
| Resolution (Å)                                                 | 46.3-3.2(3.28-3.20)                                   | 40.9-3.3(3.38-3.29)                                   |
| Unique reflections                                             | 18114(894)                                            | 16627(824)                                            |
| Completeness (%)                                               | 96.0(72.4)                                            | 90.6(33.0)                                            |
| Redundancy                                                     | 8.7(10.4)                                             | 6.2(6.9)                                              |
| <i>R</i> <sub>merge</sub> (%)                                  | 19.8(67.3)                                            | 16.9(72.0)                                            |
| <i>I</i> / <i>σ</i> ( <i>I</i> ) <sup>b</sup>                  | 10.1(2.6)                                             | 8.5(2.1)                                              |
| B. Refinement                                                  |                                                       |                                                       |
| Resolution (Å)                                                 | 46.3-3.2(3.28-3.20)                                   | 40.9-3.3(3.38-3.29)                                   |
| Number of reflections used in working set                      | 16668(882)                                            | 14621(364)                                            |
| Number of reflections for <i>R</i> <sub>free</sub> calculation | 898 (50)                                              | 784(19)                                               |
| <i>R</i> <sub>work</sub> (%)                                   | 19.1(21.5)                                            | 21.0(22.1)                                            |
| <i>R</i> <sub>free</sub> (%) <sup>a</sup>                      | 27.7(28.7)                                            | 29.7(27.2)                                            |
| Mean B-factor from Wilson plot (Å <sup>2</sup> )               | 46.0                                                  | 53.1                                                  |
| RMSD of bond length (Å)                                        | 0.01                                                  | 0.01                                                  |
| RMSD of bond angle (°)                                         | 1.46                                                  | 1.40                                                  |
| Ramachandran plot <sup>b</sup>                                 |                                                       |                                                       |
| Residues in most favored regions                               | 90.1%                                                 | 88.2%                                                 |
| Residues in additional allowed regions                         | 9.9%                                                  | 11.8%                                                 |
| Residues in generously allowed regions                         | 0.0%                                                  | 0.0%                                                  |
| Residues in disallowed regions                                 | 0.0%                                                  | 0.0%                                                  |

<sup>a</sup>A subset of the data (5%) was excluded from the refinement and used to calculate *R*<sub>free</sub>.

<sup>b</sup>Ramachandran plot is generated by Procheck<sup>1</sup>.

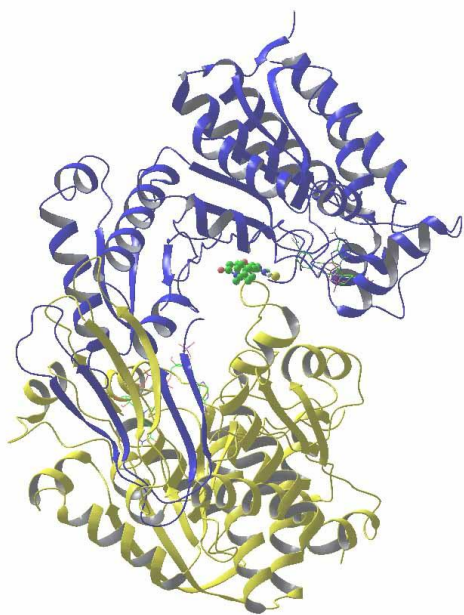

**Figure S1.** The overall structure of IDH1(R132H) in complex with compound **22** (ball & stick model) and NADPH.

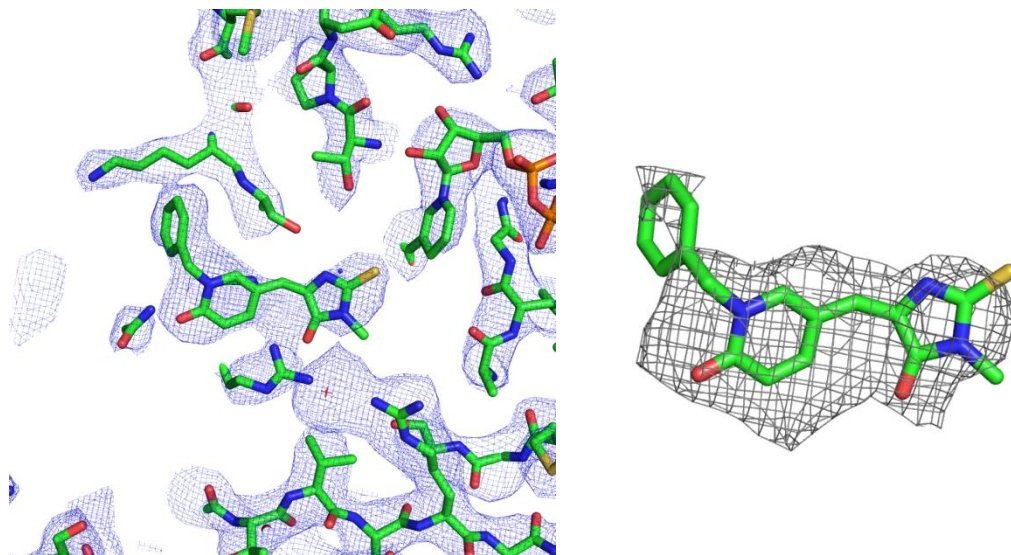

**Figure S2.** (Left) The  $2F_o-F_c$  electron density map of compound **22**, contoured at  $1\sigma$ ; (Right) The  $F_o-F_c$  omit map of **22** at  $3\sigma$ .

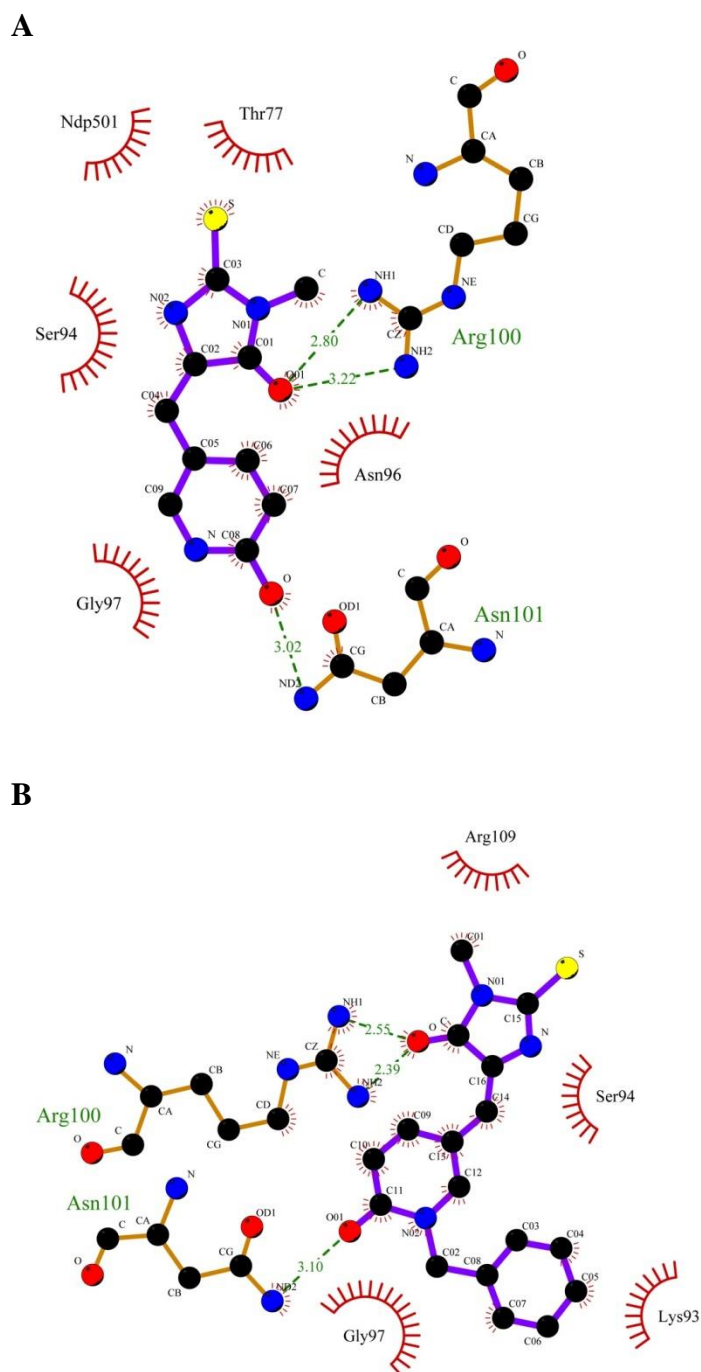

**Figure S3.** Ligand-protein interactions of between IDH1(R132H) and (A) compound **16** and (B) compound **22**.

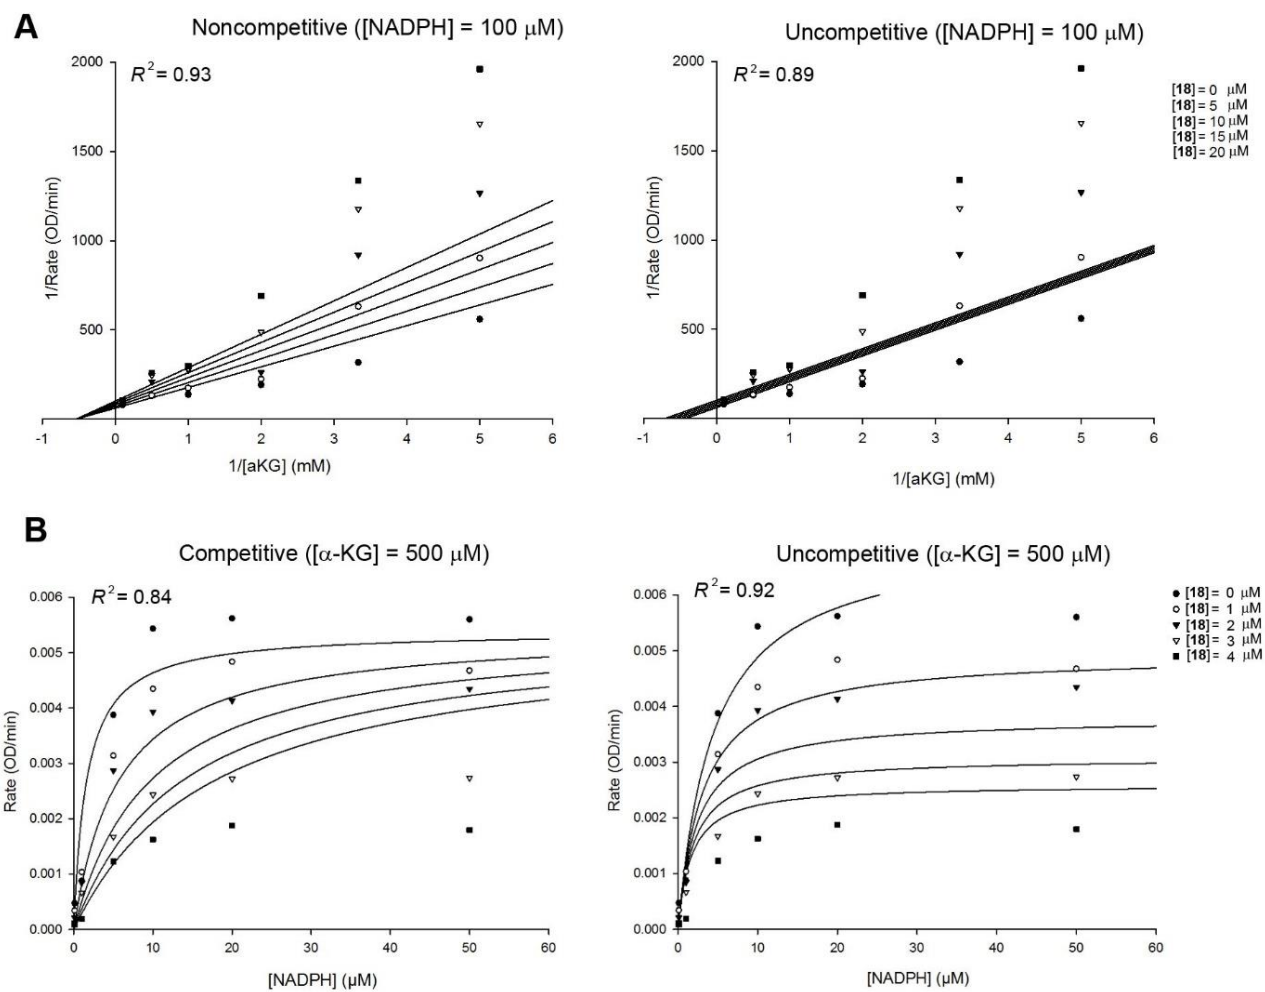

**Figure S4.** Unfavorable fitting models for enzyme kinetic studies of compound **18**. **(A)** Noncompetitive (left) and uncompetitive (right) inhibition models with variable concentrations of  $\alpha$ -KG using a Lineweaver-Burk plot; and **(B)** Competitive (left) and uncompetitive (right) inhibition models with variable concentrations of NADPH using a Michaelis-Menten plot.

## Experimental Section

All reagents were purchased from Alfa Aesar (Ward Hill, MA) or Aldrich (Milwaukee, WI). Compounds were characterized by  $^1\text{H}$  NMR on a Varian (Palo Alto, CA) 400-MR spectrometer and HRMS on a ThermoFisher LTQ-Orbitrap mass spectrometer. Compound purities were determined by a Shimadzu Prominence HPLC with a Phenomenex C18 column (4.6 x 250 mm, Methonal:H<sub>2</sub>O 60:40, monitored at 254 and 280 nm). The purities of all compounds were found to be >95%.

**General synthetic method.** Glycine (6.54g, 87 mmol) in EtOH (12 mL) containing 1 equivalent of 50% aqueous KOH (9.78 g, 87 mmol) was added R<sup>1</sup> isothiocyanate dropwise at 0 °C. The mixture was stirred for 3 h, and then acidified with 1 M HCl (200 mL) to precipitate the crude  $\alpha$ -thioureido acid product. After cooling to 0 °C, the white powder was collected by filtration, which was dissolved in acetone (250 mL) and treated with H<sub>2</sub>SO<sub>4</sub> (5 mL). Upon completion of the reaction monitored by TLC, the solvent was removed by reduced pressure and saturated aqueous NaHCO<sub>3</sub> was carefully added at 0 °C. After neutralization, the resulting precipitation was filtered to give 3-R<sup>1</sup>-substituted 2-thiohydantoin as a white powder.

A mixture of a 2-thiohydantoin (10 mmol), sodium acetate (0.8 g, 10 mmol), 6-methoxynicotinaldehyde (1.5 g, 11 mmol) or another aromatic aldehyde in 15 mL of acetic acid was refluxed for 3 h. The precipitated solid was filtered, washed successively with acetic acid, water, ethanol and diethyl ether to give (6-methoxypyridin-3-yl)methylene-2-thiohydantoin as a yellow or light brown powder, which (8.0 mmol) was refluxed overnight in 6 N HCl (10 mL). Upon cooling to room temperature, the resulting precipitate was filtered and washed with cold diethyl ether to give (2-pyridinone-3-yl)methylene-2-thiohydantoin as a brown powder. Other heterocyclic compounds in Chart 1 can be synthesized similarly with the above method.

**3-benzyl-5-(3,4-dihydroxybenzylidene)-2-thioxoimidazolidin-4-one (Compound 4).** Using the general method A described above, compound **4** was synthesized from 3-benzyl-5-(3,4-dimethoxy

benzylidene)-2-thioxoimidazolidin-4-one, yield = 73%. <sup>1</sup>H NMR (400 MHz, DMSO-*d*<sub>6</sub>): δ 11.26 (s, 1H), 8.62 (s, 1H), 8.20 (s, 1H), 7.23 (m, 2H), 7.23-7.10 (m, 4H), 6.93 (d, *J* = 8.0 Hz, 1H), 6.77 (d, *J* = 8.0 Hz, 1H), 6.49 (s, 1H), 4.99 (s, 2H).

**3-Benzyl-5-(3,4-dimethoxybenzylidene)-2-thioxoimidazolidin-4-one (Compound 5).** Using the general method A described above, compound **5** was synthesized from 3-benzyl-2-thioxoimidazolidin-4-one and 3,4-dimethoxybenzaldehyde, yield = 75%. <sup>1</sup>H NMR (400 MHz, DMSO-*d*<sub>6</sub>): δ = 3.79-3.87 (m, 6H), 5.02 (s, 2H), 6.65 (s, 1H), 7.02 (d, *J* = 8.4 Hz, 1H), 7.27-7.43 (m, 7H), 12.50 (s, 1H).

**3,4-dimethoxybenzylidene-3-phenyl-2-thioxoimidazolidin-4-one (Compound 6).** Using the general method A described above, compound **6** was synthesized from 3-phenyl-2-thioxoimidazolidin-4-one and 3,4-dimethoxybenzaldehyde, yield = 73%. <sup>1</sup>H NMR (400 MHz, DMSO-*d*<sub>6</sub>): δ = 3.79-3.87 (m, 6H), 6.67 (s, 1H), 7.40 (d, *J* = 8.4 Hz, 1H), 7.33-7.54 (m, 7H), 12.60 (s, 1H).

**3,4-dimethoxybenzylidene-3-(4-methoxybenzyl)-2-thioxoimidazolidin-4-one (Compound 7).** Using the general method A described above, compound **7** was synthesized from 3-(4-methoxybenzyl)-2-thioxoimidazolidin-4-one and 3,4-dimethoxybenzaldehyde, yield = 70%. <sup>1</sup>H NMR (400 MHz, DMSO-*d*<sub>6</sub>): δ = 3.71 (s, 3H), 3.79 (s, 3H), 3.874 (s, 3H), 4.94 (s, 2H), 6.62 (s, 1H), 6.84-6.90 (m, 2H), 7.02 (d, *J* = 8.8 Hz, 1H), 7.24-7.33 (m, 3H), 7.39-7.42 (m, 1H), 12.45 (s, 1H).

**3,4-dihydroxybenzylidene-3-phenyl-2-thioxoimidazolidin-4-one (Compound 8).** Using the general method A described above, compound **8** was synthesized from compound **6**, yield = 50%. <sup>1</sup>H NMR (400 MHz, DMSO-*d*<sub>6</sub>): δ = 6.55 (s, 1H), 6.81 (d, *J* = 8.4 Hz, 1H), 7.18-7.22 (m, 2H), 7.35-7.38 (m, 2H), 7.45-7.55 (m, 5H), 12.41 (s, 1H).

**3,4-dihydroxybenzylidene-3-(4-hydroxybenzyl)-2-thioxoimidazolidin-4-one (Compound 9).** Using the general method A described above, compound **9** was synthesized from compound **7**, yield = 50%. <sup>1</sup>H NMR (400 MHz, DMSO-*d*<sub>6</sub>): δ = 4.87 (s, 2H), 6.49 (s, 1H), 6.68-6.72 (m, 2H), 7.79 (d, *J* = 8.4 Hz, 1H), 7.13-7.19 (m, 4H), 12.25 (s, 1H).



**3-benzyl-5-(pyridin-3-ylmethylene)-2-thioxoimidazolidin-4-one (Compound 10).** Using the general method A described above, compound **10** was synthesized from 3-benzyl-2-thioxoimidazolidin-4-one and nicotinaldehyde, yield = 70%. <sup>1</sup>H NMR (400 MHz, DMSO-*d*<sub>6</sub>): δ = 4.93 (s, 2H), 6.19 (s, 1H), 7.20-7.38 (m, 6H), 8.37 (dd, *J* = 4.8, 1.6 Hz, 1H), 8.59 (d, *J* = 8.0 Hz, 1H), 8.99 (d, *J* = 2.0 Hz, 1H).

**3-benzyl-5-((6-methoxypyridin-3-yl)methylene)-2-thioxoimidazolidin-4-one (Compound 11).** Using the general method A described above, compound **11** was synthesized from 3-benzyl-2-thioxoimidazolidin-4-one and 6-methoxynicotinaldehyde, yield = 70%. <sup>1</sup>H NMR (400 MHz, DMSO-*d*<sub>6</sub>): δ = 3.90 (s, 3H), 5.01 (s, 2H), 6.67 (s, 1H), 6.91 (d, *J* = 8.8 Hz, 1H), 7.24-7.33 (m, 5H), 8.21 (dd, *J* = 8.8, 2.4 Hz, 1H), 8.55 (d, *J* = 2.4 Hz, 1H), 12.52 (s, 1H).

**5-((1-benzyl-5-oxo-2-thioxoimidazolidin-4-ylidene)methyl)pyridin-2(1H)-one (Compound 12).**

Using the general method A described above, compound **12** was synthesized from compound **11**, yield = 50%. <sup>1</sup>H NMR (400 MHz, DMSO-*d*<sub>6</sub>): δ = 4.99 (s, 2H), 6.40 (d, *J* = 9.6 Hz, 1H), 6.55 (s, 1H), 7.25-7.33 (m, 5H), 7.97 (dd, *J* = 9.6, 2.4 Hz, 1H), 8.00 (d, *J* = 2.4 Hz, 1H), 12.34 (s, 1H).

**3-ethyl-5-((6-methoxypyridin-3-yl)methylene)-2-thioxoimidazolidin-4-one (Compound 13).** Using the general method A described above, compound **13** was synthesized from 3-ethyl-2-thioxoimidazolidin-4-one and 6-methoxynicotinaldehyde. yield = 76%. <sup>1</sup>H NMR (400 MHz, DMSO-*d*<sub>6</sub>): δ = 1.16 (t, *J* = 4.4 Hz, 3H), 3.81-3.84 (m, 2H), 3.90 (s, 3H), 6.63 (s, 1H), 6.90 (d, *J* = 8.8 Hz, 1H), 8.20 (dd, *J* = 8.8, 2.8 Hz, 1H), 8.54 (d, *J* = 2.4 Hz, 1H), 12.38 (s, 1H).

**5-((1-ethyl-5-oxo-2-thioxoimidazolidin-4-ylidene)methyl)pyridin-2(1H)-one (Compound 14).**

Using the general method A described above, compound **14** was synthesized from compound **13**. yield = 72%. <sup>1</sup>H NMR (400 MHz, DMSO-*d*<sub>6</sub>): δ = 1.10-1.17 (m, 3H), 3.78-3.83 (m, 2H), 6.38 (d, *J* = 9.2 Hz, 1H), 6.51 (s, 1H), 7.92-8.01 (m, 2H), 12.20 (brs, 2H).

**5-((6-methoxypyridin-3-yl)methylene)-3-methyl-2-thioxoimidazolidin-4-one (Compound 15).** Using the general method A described above, compound **15** was synthesized from 3-methyl-2-thioxoimidazolidin-4-one and 6-methoxynicotinaldehyde. yield = 77%. <sup>1</sup>H NMR (400 MHz, DMSO-*d*<sub>6</sub>): δ =

3.20 (s, 3H), 3.90 (s, 3H), 6.63 (s, 1H), 6.90 (d,  $J = 8.8$  Hz, 1H), 8.20 (dd,  $J = 8.8, 2.0$  Hz, 1H), 8.54 (d,  $J = 2.8$  Hz, 1H).

**5-((1-ethyl-5-oxo-2-thioxoimidazolidin-4-ylidene)methyl)pyridin-2(1H)-one (Compound 16).** Using the general method described above, compound **16** was synthesized from 3-methyl-2-thiohydantoin (1.2g, 10 mmol) and 6-methoxynicotinaldehyde (1.5 g, 11 mmol), followed by deprotection (refluxing in 6N HCl), as a brown powder (1.3g, 65% yield).  $^1\text{H}$  NMR (400 MHz, DMSO- $d_6$ ):  $\delta = 3.18$  (s, 3H), 6.38 (d,  $J = 9.6$  Hz, 1H), 6.51 (s, 1H), 7.95 (dd,  $J = 9.6, 2.8$  Hz, 1H), 8.00 (d,  $J = 2.8$  Hz, 1H), 12.20 (brs, 2H); HRMS (ESI)  $[\text{M}+\text{H}]^+$  Calcd for  $\text{C}_{10}\text{H}_{10}\text{N}_3\text{O}_2\text{S}^+$ : 236.0488, Found: 236.0493.

**5-((6-methoxypyridin-3-yl)methylene)-2-thioxoimidazolidin-4-one (Compound 17).** Using the general method A described above, compound **17** was synthesized from 2-thioxoimidazolidin-4-one and 6-methoxynicotinaldehyde, yield = 75%.  $^1\text{H}$  NMR (400 MHz, DMSO- $d_6$ ):  $\delta = 3.90$  (s, 3H), 6.49 (s, 1H), 6.89 (d,  $J = 8.8$  Hz, 1H), 8.18 (dd,  $J = 8.8, 2.4$  Hz, 1H), 8.51 (d,  $J = 2.4$  Hz, 1H), 12.17 (s, 1H), 12.36 (s, 1H).

**5-((5-oxo-2-thioxoimidazolidin-4-ylidene)methyl)pyridin-2(1H)-one (Compound 18).** Using the general method described above, compound **18** was synthesized from 2-thiohydantoin (1.2g, 10 mmol) and 6-methoxynicotinaldehyde (1.5 g, 11 mmol), followed by deprotection (refluxing in 6N HCl), as a brown powder (1.5g, 71% yield).  $^1\text{H}$  NMR (400 MHz, DMSO- $d_6$ ):  $\delta = 6.26$  (s, 1H), 6.37 (d,  $J = 10.8$  Hz, 1H), 7.75-7.80 (m, 2H), 10.36 (s, 1H), 11.13 (s, 1H), 11.75 (s, 1H), 12.64 (s, 1H); HRMS (ESI)  $[\text{M}+\text{H}]^+$  Calcd for  $\text{C}_9\text{H}_8\text{N}_3\text{O}_2\text{S}^+$ : 222.0332, Found: 222.0340.

**2-(4-((6-methoxypyridin-3-yl)methylene)-5-oxo-2-thioxoimidazolidin-1-yl)acetic acid (Compound 19).** Using the general method A described above, compound **19** was synthesized from ethyl 2-(5-oxo-2-thioxoimidazolidin-1-yl)acetate and 6-methoxynicotinaldehyde, yield = 78% based on aldehyde.  $^1\text{H}$  NMR (400 MHz, DMSO- $d_6$ ):  $\delta = 3.91$  (s, 3H), 4.50 (s, 2H), 6.71 (s, 1H), 6.92 (d,  $J = 8.8$  Hz, 1H), 8.23 (d,  $J = 8.8$  Hz, 1H), 8.57 (s, 1H), 12.57 (s, 1H), 13.24 (s, 1H).

### **2-(5-oxo-4-((6-oxo-1,6-dihydropyridin-3-yl)methylene)-2-thioxoimidazolidin-1-yl)acetic acid**

**(Compound 20).** Using the general method A described above, compound **20** was synthesized from compound **19**, yield = 70%. <sup>1</sup>H NMR (400 MHz, DMSO-*d*<sub>6</sub>): δ = 4.48 (s, 2H), 6.39 (s, 1H), 6.59 (s, 1H), 7.81-8.05 (m, 3H), 12.21 (s, 1H), 12.41 (s, 1H).

### **1-methyl-5-((1-methyl-5-oxo-2-thioxoimidazolidin-4-ylidene)methyl)pyridin-2(1H)-one**

**(Compound 21).** Using the general method A described above, compound **21** was synthesized from 3-methyl-2-thioxo-imidazolidin-4-one and 1-methyl-6-oxo-1,6-dihydropyridine-3-carbaldehyde, yield = 71%. <sup>1</sup>H NMR (400 MHz, DMSO-*d*<sub>6</sub>): δ = 3.19 (s, 3H), 3.51 (s, 3H), 6.42-6.46 (m, 2H), 7.87 (dd, *J* = 9.6, 2.8 Hz, 1H), 8.29 (d, *J* = 2.4 Hz, 1H).

### **1-benzyl-5-((1-methyl-5-oxo-2-thioxoimidazolidin-4-ylidene)methyl)pyridin-2(1H)-one**

**(Compound 22).** Using the general method described above, compound **22** was synthesized from 3-methyl-2-thiohydantoin (0.6g, 5 mmol) and 1-benzyl-6-oxo-1,6-dihydropyridine-3-carbaldehyde (1.2 g, 6 mmol) as a yellow powder (1.3g, 77% yield). <sup>1</sup>H NMR (400 MHz, DMSO-*d*<sub>6</sub>): δ = 3.19 (s, 3H), 5.14 (s, 2H), 6.45-6.51 (m, 2H), 7.27-7.36 (m, 5H), 7.90-7.95 (m, 1H) 8.45 (d, *J* = 2.8 Hz, 1H), 12.20 (s, 1H); HRMS (ESI) [M+H]<sup>+</sup> Calcd for C<sub>17</sub>H<sub>16</sub>N<sub>3</sub>O<sub>2</sub>S<sup>+</sup>: 326.0958, Found: 326.0966.

### **2-methoxy-5-((1-methyl-5-oxo-2-thioxoimidazolidin-4-ylidene)methyl)pyridine 1-oxide**

**(Compound 23).** Using the general method A described above, compound **23** was synthesized from 3-methyl-2-thioxo-imidazolidin-4-one and 5-formyl-2-methoxypyridine 1-oxide, yield = 57%. <sup>1</sup>H NMR (400 MHz, DMSO-*d*<sub>6</sub>): δ = 3.18 (s, 3H), 4.01 (s, 3H), 6.45-6.61 (m, 2H), 7.88 (d, *J* = 9.2 Hz, 1H), 8.61 (s, 1H), 12.25 (s, 1H).

### **1-hydroxy-5-((1-methyl-5-oxo-2-thioxoimidazolidin-4-ylidene)methyl)pyridin-2(1H)-one**

**(Compound 24).** Using the general method A described above, compound **24** was synthesized from 3-methyl-2-thioxo-imidazolidin-4-one and 1-hydroxy-6-oxo-1,6-dihydropyridine-3-carbaldehyde, yield = 30%. <sup>1</sup>H NMR (400 MHz, DMSO-*d*<sub>6</sub>): δ = 3.17 (s, 3H), 6.38 (s, 1H), 6.55 (d, *J* = 9.6 Hz, 1H), 7.78-7.80 (m, 1H), 8.37 (d, *J* = 2.0 Hz, 1H), 10.65 (s, 1H), 12.17 (s, 1H).

**5-((2-methoxypyridin-3-yl)methylene)-3-methyl-2-thioxoimidazolidin-4-one (Compound 25).** Using the general method A described above, compound **25** was synthesized from 3-methyl-2-thioxoimidazolidin-4-one and 2-methoxynicotinaldehyde, yield = 78%. <sup>1</sup>H NMR (400 MHz, DMSO-*d*<sub>6</sub>): δ = 3.20 (s, 3H), 3.95 (s, 3H), 6.66 (s, 1H), 7.05-7.09 (m, 1H), 8.11-8.20 (m, 2H), 12.32 (s, 1H).

**3-((1-methyl-5-oxo-2-thioxoimidazolidin-4-ylidene)methyl)pyridin-2(1H)-one (Compound 26).**

Using the general method A described above, compound **26** was synthesized from compound **25**, yield = 72%. <sup>1</sup>H NMR (400 MHz, DMSO-*d*<sub>6</sub>): δ = 3.18 (s, 3H), 6.45-6.49 (m, 2H), 7.61-7.65 (m, 1H), 7.99-8.02 (m, 1H), 12.45 (brs, 1H), 12.59 (brs, 1H).

**5-((6-methoxypyridin-2-yl)methylene)-3-methyl-2-thioxoimidazolidin-4-one (Compound 27).** Using the general method A described above, compound **27** was synthesized from 3-methyl-2-thioxoimidazolidin-4-one and 6-methoxypicolinaldehyde, yield = 70%. <sup>1</sup>H NMR (400 MHz, DMSO-*d*<sub>6</sub>): δ = 3.22 (s, 3H), 3.99 (s, 3H), 6.70 (s, 1H), 6.89 (s, *J* = 8.0 Hz, 1H), 7.38 (d, *J* = 8.0 Hz, 1H), 7.82 (dd, *J* = 8.0, 6.8 Hz, 1H).

**6-((1-methyl-5-oxo-2-thioxoimidazolidin-4-ylidene)methyl)pyridin-2(1H)-one (Compound 28).**

Using the general method A described above, compound **28** was synthesized from compound **27**, yield = 75%. <sup>1</sup>H NMR (400 MHz, DMSO-*d*<sub>6</sub>): δ = 3.18 (s, 3H), 6.31 (s, 1H), 6.44 (d, *J* = 9.2 Hz, 1H), 6.63 (d, *J* = 7.2 Hz, 1H), 7.49 (dd, *J* = 9.2, 7.2 Hz, 1H).

**3-methyl-5-(pyridin-4-ylmethylene)-2-thioxoimidazolidin-4-one (Compound 29).** Using the general method A described above, compound **29** was synthesized from 3-methyl-2-thioxoimidazolidin-4-one and isonicotinaldehyde, yield = 75%. <sup>1</sup>H NMR (400 MHz, DMSO-*d*<sub>6</sub>): δ = 3.20 (s, 3H), 6.55 (s, 1H), 7.70 (d, *J* = 6.4 Hz, 2H), 8.61 (d, *J* = 6.0 Hz, 2H).

**5-((2-methoxypyridin-4-yl)methylene)-3-methyl-2-thioxoimidazolidin-4-one (Compound 30).** Using the general method A described above, compound **30** was synthesized from 3-methyl-2-thioxoimidazolidin-4-one and 2-methoxyisonicotinaldehyde, yield = 77%. <sup>1</sup>H NMR (400 MHz, DMSO-*d*<sub>6</sub>): δ

= 3.18 (s, 3H), 3.87 (s, 3H), 6.50 (s, 1H), 7.15 (s, 1H), 7.29 (dd,  $J = 5.2, 1.6$  Hz, 1H), 8.19 (d,  $J = 5.2$  Hz, 1H).

**4-((1-methyl-5-oxo-2-thioxoimidazolidin-4-ylidene)methyl)pyridin-2(1H)-one (Compound 31).**

Using the general method A described above, compound **31** was synthesized from compound **30**, yield = 71%.  $^1\text{H NMR}$  (400 MHz, DMSO- $d_6$ ):  $\delta = 3.16$  (s, 3H), 6.36 (s, 1H), 6.84 (s, 1H), 6.88 (dd,  $J = 6.8, 1.6$  Hz, 1H), 7.36 (d,  $J = 6.8$  Hz, 1H), 12.14 (s, 1H), 12.41 (s, 1H).

**5-((2-bromopyridin-4-yl)methylene)-2-thioxoimidazolidin-4-one (Compound 32).** Using the general method A described above, compound **32** was synthesized from 2-thioxoimidazolidin-4-one and 2-bromoisonicotinaldehyde, yield = 71%.  $^1\text{H NMR}$  (400 MHz, DMSO- $d_6$ ):  $\delta = 6.39$  (s, 1H), 7.63 (d,  $J = 5.2$  Hz, 1H), 7.81 (s, 1H), 8.40 (d,  $J = 5.2$  Hz, 1H), 12.41 (brs, 1H), 12.59 (brs, 1H).

**5-((2-phenylpyridin-4-yl)methylene)-2-thioxoimidazolidin-4-one (Compound 33).** Using the general method B described above, compound **33** was synthesized from 2-thioxoimidazolidin-4-one, phenylboronic acid and 2-bromoisonicotinaldehyde, yield = 75%.  $^1\text{H NMR}$  (400 MHz, DMSO- $d_6$ ):  $\delta = 6.49$  (s, 1H), 7.43-7.64 (m, 4H), 8.08-8.13 (m, 3H), 8.66 (d,  $J = 4.8$  Hz, 1H), 12.47 (brs, 1H), 12.56 (brs, 1H).

**5-((5-(3,4-difluorophenyl)furan-2-yl)methylene)-3-methyl-2-thioxoimidazolidin-4-one (Compound 34).** Using the general method B described above, yield = 75%.  $^1\text{H NMR}$  (400 MHz, DMSO- $d_6$ ):  $\delta = 3.21$  (s, 3H), 6.57 (s, 1H), 7.27-7.32 (m, 2H), 7.53-7.60 (m, 1H) 7.81-7.84 (m, 1H), 8.12-8.18 (m, 1H).

**5-((6-methoxypyridin-3-yl)methylene)-2-thioxothiazolidin-4-one (Compound 35).** Using the general method A described above, compound **35** was synthesized from 2-thioxothiazolidin-4-one and 6-methoxynicotinaldehyde, yield = 75%.  $^1\text{H NMR}$  (400 MHz, DMSO- $d_6$ ):  $\delta = 3.93$  (s, 3H), 6.99 (d,  $J = 8.8$  Hz, 1H), 7.66 (s, 1H), 7.88 (dd,  $J = 8.8, 2.8$  Hz, 1H), 8.52 (d,  $J = 2.4$  Hz, 1H).

**5-((6-oxo-1,6-dihydropyridin-3-yl)methylene)-2-thioxothiazolidin-4-one (Compound 36).** Using the general method A described above, compound **36** was synthesized from compound **35**, yield = 70%.  $^1\text{H}$

NMR (400 MHz, DMSO- $d_6$ ):  $\delta$  = 6.50 (d,  $J$  = 10.0 Hz, 1H), 7.53 (s, 1H), 7.60 (dd,  $J$  = 9.6, 2.8 Hz, 1H), 8.05 (d,  $J$  = 2.4 Hz, 1H).

**5-((6-methoxypyridin-3-yl)methylene)imidazolidine-2,4-dione (Compound 37).** Using the general method A described above, compound **37** was synthesized from imidazolidine-2,4-dione and 6-methoxynicotinaldehyde, yield = 71%.  $^1\text{H}$  NMR (400 MHz, DMSO- $d_6$ ):  $\delta$  = 3.88 (s, 3H), 6.40 (s, 1H), 6.85 (d,  $J$  = 8.8 Hz, 1H), 8.01 (dd,  $J$  = 8.8, 2.4 Hz, 1H), 8.41 (d,  $J$  = 2.8 Hz, 1H), 10.51 (s, 1H), 11.22 (s, 1H).

**5-((6-oxo-1,6-dihydropyridin-3-yl)methylene)imidazolidine-2,4-dione (Compound 38).** Using the general method A described above, compound **38** was synthesized from compound **37**, yield = 72%.  $^1\text{H}$  NMR (400 MHz, DMSO- $d_6$ ):  $\delta$  = 6.26 (s, 1H), 6.36 (d,  $J$  = 9.6 Hz, 1H), 7.75-7.79 (m, 2H), 10.37 (s, 1H), 11.14 (s, 1H).

**5-((2-amino-4-oxo-1H-imidazol-5(4H)-ylidene)methyl)pyridin-2(1H)-one (Compound 39).** Using the general method A described above, compound **39** was synthesized from 2-amino-1H-imidazol-4(5H)-one and 6-hydroxynicotinaldehyde, yield = 71%.  $^1\text{H}$  NMR (400 MHz, DMSO- $d_6$ ):  $\delta$  = 6.11 (s, 1H), 6.35 (d,  $J$  = 9.6 Hz, 1H), 7.06 (brs, 2H), 8.03 (s, 1H), 8.15 (brs, 1H).

**5-((2-(methylthio)-4-oxo-1H-imidazol-5(4H)-ylidene)methyl)pyridin-2(1H)-one (Compound 40).** Using the general method A described above, compound **40** was synthesized from 2-(methylthio)-1H-imidazol-4(5H)-one and 6-hydroxynicotinaldehyde, yield = 72% based on aldehyde.  $^1\text{H}$  NMR (400 MHz, DMSO- $d_6$ ):  $\delta$  = 2.61 (s, 3H), 6.40 (d,  $J$  = 9.6 Hz, 1H), 6.63 (s, 1H), 8.17 (d,  $J$  = 2.8 Hz, 1H), 8.49 (dd,  $J$  = 9.6, 2.8 Hz, 1H).

**5-((1,3-dimethyl-5-oxo-2-thioxoimidazolidin-4-ylidene)methyl)pyridin-2(1H)-one (Compound 41).** Using the general method A described above, compound **41** was synthesized from 1,3-dimethyl-2-thioxoimidazolidin-4-one and 6-hydroxynicotinaldehyde, yield = 74%.  $^1\text{H}$  NMR (400 MHz, DMSO- $d_6$ ):  $\delta$  = 3.22 (s, 3H), 3.52 (s, 3H), 6.40 (d,  $J$  = 10.0 Hz, 1H), 6.75 (s, 1H), 8.35 (dd,  $J$  = 9.6, 2.4 Hz, 1H), 8.47 (d,  $J$  = 2.4 Hz, 1H).
